# Supplementary material for: Enhancing Clinical Information Display to Improve Patient Encounters: Human-Centered Design and Evaluation of the Parkinson Disease-BRIDGE Platform
Source: PubMed Central journal article supplement (PMC9123539; doi:10.2196/33967), 2022-05-06
Supplement: humanfactors_v9i2e33967_app1.pdf [file humanfactors_v9i2e33967_app1.pdf]

Record ID \_\_\_\_\_

Today's Date \_\_\_\_\_

Full Name \_\_\_\_\_

Clinician \_\_\_\_\_

**We would like to ask you some questions about your visit today. Please note that these answers will not be shared with your provider except in anonymous, aggregated form.**

**Thinking about today's visit with your movement disorders doctor, how satisfactory was your doctor at each of the following?**

|                                            | Very Good             | Good                  | Neither Good Nor Poor | Poor                  | Very Poor             | Doesn't Apply         |
|--------------------------------------------|-----------------------|-----------------------|-----------------------|-----------------------|-----------------------|-----------------------|
| Spent sufficient time with you             | <input type="radio"/> | <input type="radio"/> | <input type="radio"/> | <input type="radio"/> | <input type="radio"/> | <input type="radio"/> |
| Asking about your symptoms                 | <input type="radio"/> | <input type="radio"/> | <input type="radio"/> | <input type="radio"/> | <input type="radio"/> | <input type="radio"/> |
| Listening to you                           | <input type="radio"/> | <input type="radio"/> | <input type="radio"/> | <input type="radio"/> | <input type="radio"/> | <input type="radio"/> |
| Explaining tests and treatments            | <input type="radio"/> | <input type="radio"/> | <input type="radio"/> | <input type="radio"/> | <input type="radio"/> | <input type="radio"/> |
| Involving you in decisions about your care | <input type="radio"/> | <input type="radio"/> | <input type="radio"/> | <input type="radio"/> | <input type="radio"/> | <input type="radio"/> |
| Treating you with care and concern         | <input type="radio"/> | <input type="radio"/> | <input type="radio"/> | <input type="radio"/> | <input type="radio"/> | <input type="radio"/> |
| Taking your problems seriously             | <input type="radio"/> | <input type="radio"/> | <input type="radio"/> | <input type="radio"/> | <input type="radio"/> | <input type="radio"/> |

Overall, do you feel satisfied with today's visit?  Yes  No

BRIDGE is a web-based instrument / clinical dashboard that your doctor may have used in your visit today to discuss your symptoms.  Yes  No

Did your doctor use the BRIDGE tool in your visit today?

### We would appreciate your feedback about BRIDGE.

#### Using BRIDGE was helpful for my visit, in terms of:

|                                              | Agree Strongly        | Agree Somewhat        | Neither Agree<br>Nor Disagree | Disagree<br>Somewhat  | Disagree<br>Strongly  |
|----------------------------------------------|-----------------------|-----------------------|-------------------------------|-----------------------|-----------------------|
| Communicating with my doctor                 | <input type="radio"/> | <input type="radio"/> | <input type="radio"/>         | <input type="radio"/> | <input type="radio"/> |
| Understanding my disease trajectory          | <input type="radio"/> | <input type="radio"/> | <input type="radio"/>         | <input type="radio"/> | <input type="radio"/> |
| Understanding my clinician's recommendations | <input type="radio"/> | <input type="radio"/> | <input type="radio"/>         | <input type="radio"/> | <input type="radio"/> |

#### Now, a few questions about the data shown in BRIDGE:

##### I felt comfortable...

|                                                                  | Agree Strongly        | Agree Somewhat        | Neither Agree<br>Nor Disagree | Disagree<br>Somewhat  | Disagree<br>Strongly  |
|------------------------------------------------------------------|-----------------------|-----------------------|-------------------------------|-----------------------|-----------------------|
| Seeing my own data points                                        | <input type="radio"/> | <input type="radio"/> | <input type="radio"/>         | <input type="radio"/> | <input type="radio"/> |
| Comparing my data with other patient's data                      | <input type="radio"/> | <input type="radio"/> | <input type="radio"/>         | <input type="radio"/> | <input type="radio"/> |
| Having my data used to inform decision making for other patients | <input type="radio"/> | <input type="radio"/> | <input type="radio"/>         | <input type="radio"/> | <input type="radio"/> |
| With the level of privacy of my data included in the BRIDGE tool | <input type="radio"/> | <input type="radio"/> | <input type="radio"/>         | <input type="radio"/> | <input type="radio"/> |

#### Finally, please let us know:

What worked well for you?

---

What did NOT work well for you?

---

Would you want the opportunity to consult directly with a member of the BRIDGE research team?

Yes  No
