# Supplementary material for: Enhancing Clinical Information Display to Improve Patient Encounters: Human-Centered Design and Evaluation of the Parkinson Disease-BRIDGE Platform
Source: PubMed Central journal article supplement (PMC9123539; doi:10.2196/33967), 2022-05-06
Supplement: humanfactors_v9i2e33967_app2.pdf [file humanfactors_v9i2e33967_app2.pdf]

Record ID

\_\_\_\_\_

Today's Date

\_\_\_\_\_

Clinician Name

\_\_\_\_\_

Patient Name

\_\_\_\_\_

Patient Code

\_\_\_\_\_

**First, a few questions about today's visit.**

**To what extent do you agree or disagree with the following statements?**

|                                                                                                                   | Agree Strongly        | Agree Somewhat        | Neither Agree Nor Disagree | Disagree Somewhat     | Disagree Strongly     |
|-------------------------------------------------------------------------------------------------------------------|-----------------------|-----------------------|----------------------------|-----------------------|-----------------------|
| I am globally satisfied with my visit with the patient                                                            | <input type="radio"/> | <input type="radio"/> | <input type="radio"/>      | <input type="radio"/> | <input type="radio"/> |
| I was able to tackle the issues important to my patient                                                           | <input type="radio"/> | <input type="radio"/> | <input type="radio"/>      | <input type="radio"/> | <input type="radio"/> |
| I had the right visual aides to explain my patient's disease to them                                              | <input type="radio"/> | <input type="radio"/> | <input type="radio"/>      | <input type="radio"/> | <input type="radio"/> |
| I spent a long time looking through my patient's record in Apex                                                   | <input type="radio"/> | <input type="radio"/> | <input type="radio"/>      | <input type="radio"/> | <input type="radio"/> |
| In communicating with my patient, it was appropriate to see their disease course in the context of a wider cohort | <input type="radio"/> | <input type="radio"/> | <input type="radio"/>      | <input type="radio"/> | <input type="radio"/> |
| I had some difficulty communicating with my patient about their disease course                                    | <input type="radio"/> | <input type="radio"/> | <input type="radio"/>      | <input type="radio"/> | <input type="radio"/> |
| I had some difficulty communicating with my patient about my care recommendations                                 | <input type="radio"/> | <input type="radio"/> | <input type="radio"/>      | <input type="radio"/> | <input type="radio"/> |
| I don't have access to all the data relevant to caring for my patient                                             | <input type="radio"/> | <input type="radio"/> | <input type="radio"/>      | <input type="radio"/> | <input type="radio"/> |

Was BRIDGE used during this visit?

Yes  No

BRIDGE helped me "get on the same page" as my patient.

- Agree Strongly     Agree Somewhat  
 Neither Agree or Disagree  
 Disagree Somewhat     Disagree Strongly

**To what extent do you agree or disagree with the following statements?**

**The data retrieved by BRIDGE about my patient...**

|                                                                | Agree Strongly        | Agree Somewhat        | Neither Agree Nor Disagree | Disagree Somewhat     | Disagree Strongly     |
|----------------------------------------------------------------|-----------------------|-----------------------|----------------------------|-----------------------|-----------------------|
| was exhaustive                                                 | <input type="radio"/> | <input type="radio"/> | <input type="radio"/>      | <input type="radio"/> | <input type="radio"/> |
| was up to date                                                 | <input type="radio"/> | <input type="radio"/> | <input type="radio"/>      | <input type="radio"/> | <input type="radio"/> |
| was more complete than the data I can retrieve through the EHR | <input type="radio"/> | <input type="radio"/> | <input type="radio"/>      | <input type="radio"/> | <input type="radio"/> |

**To what extent do you agree or disagree with the following statements?**

**BRIDGE as a whole improved my ability to...**

|                                        | Agree Strongly        | Agree Somewhat        | Neither Agree Nor Disagree | Disagree Somewhat     | Disagree Strongly     |
|----------------------------------------|-----------------------|-----------------------|----------------------------|-----------------------|-----------------------|
| understand my patient's disease course | <input type="radio"/> | <input type="radio"/> | <input type="radio"/>      | <input type="radio"/> | <input type="radio"/> |
| drive clinical care recommendations    | <input type="radio"/> | <input type="radio"/> | <input type="radio"/>      | <input type="radio"/> | <input type="radio"/> |
| communicate with my patient            | <input type="radio"/> | <input type="radio"/> | <input type="radio"/>      | <input type="radio"/> | <input type="radio"/> |

What worked well?

\_\_\_\_\_

What could be improved?

\_\_\_\_\_
